# Supplementary material for: Robotic inspection of reactor internals and fuel transfer channel
Source: Royal Society of Chemistry journal article supplement (doi:10.1039/c6cp05569a), 1990-08-01
Supplement: c6cp05569a1.pdf [file c6cp05569a1.pdf]

## Supporting Information

### Phenols as probes of chemical composition of graphene oxide

Tran Thi Mai Huong, Adriano Ambrosi, Martin Pumera\*

Division of Chemistry and Biological Chemistry, School of Physical and Mathematical Sciences, Nanyang Technological University, 21 Nanyang Link, Singapore 637371, Singapore

\*E-mail: pumera@ntu.edu.sg

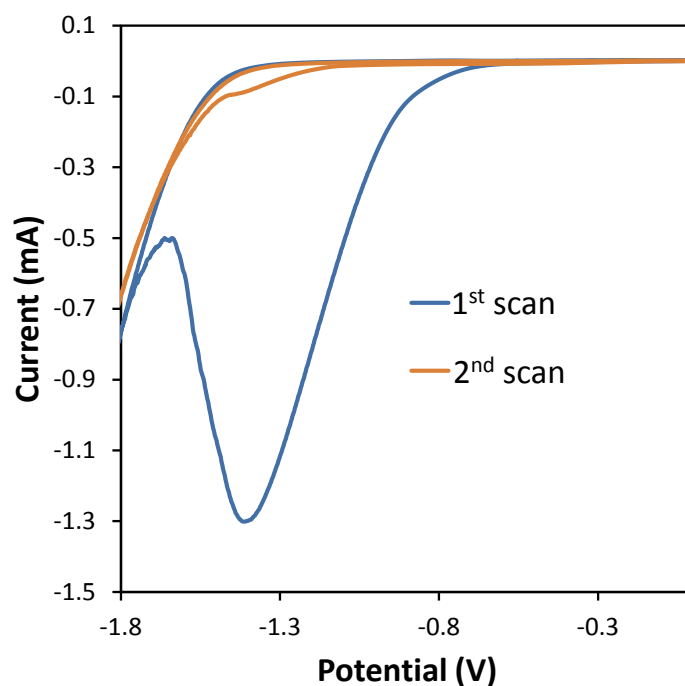

**Figure S1.** Cyclic voltammogram of graphene oxide (GO) in PBS pH 7.2 deposited on GC electrode. Scan rate 0.1 V s<sup>-1</sup>.

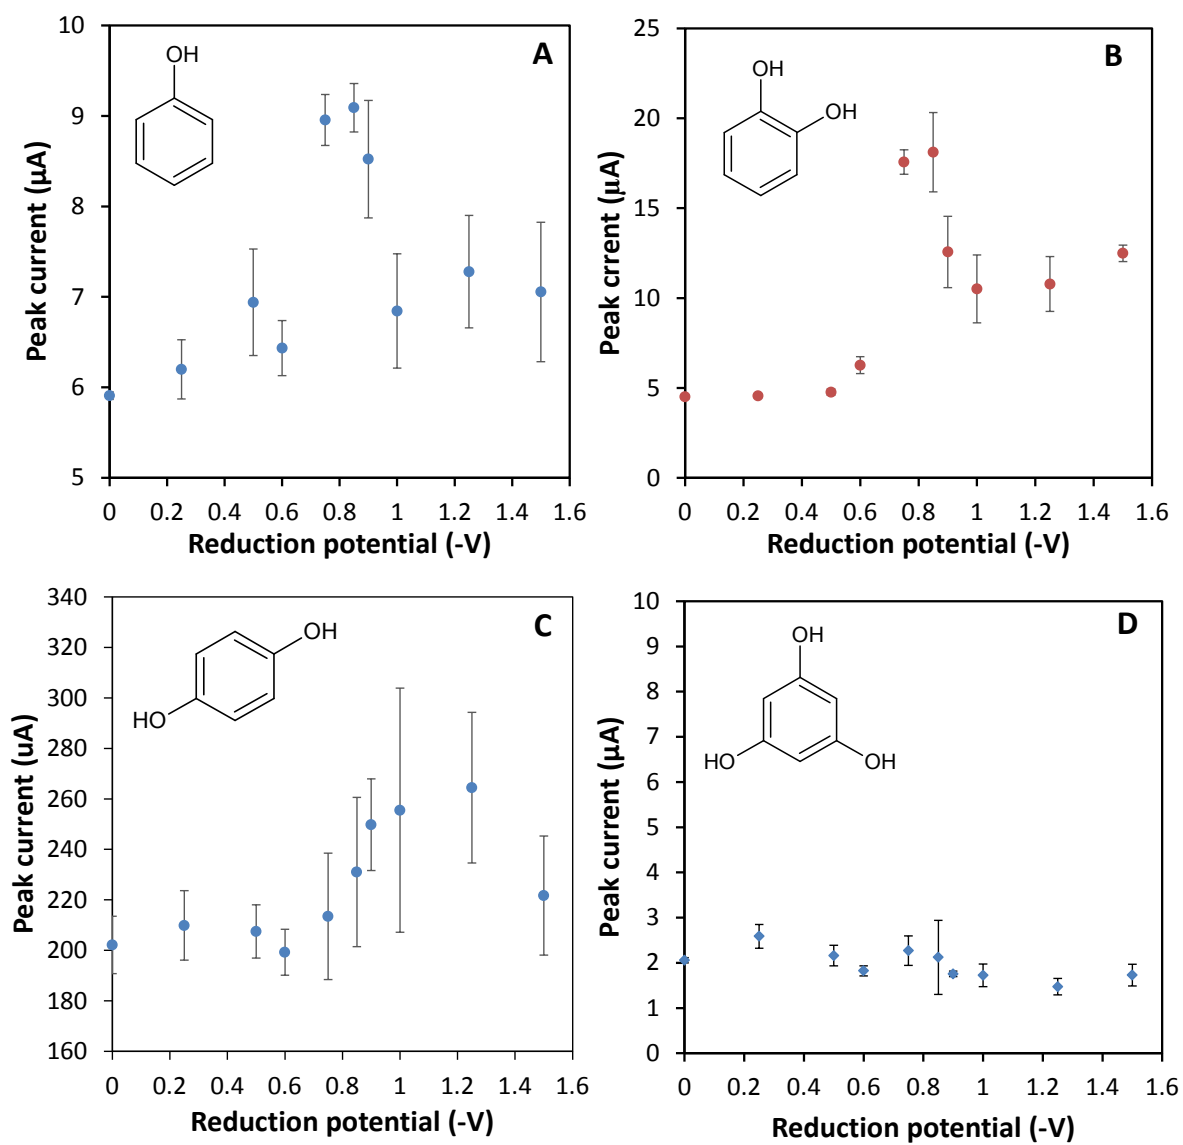

**Figure S2.** Peak current variation against reduction potential of GO material for A) phenol, B) catechol, C) hydroquinone and D) phloroglucinol.
